# Highly specific enrichment of rare nucleic acids using *Thermus thermophilus* Argonaute

Jinzhao Song<sup>1,4\*</sup>, Jorrit W. Hegge<sup>2,4</sup>, Michael G. Mauk<sup>1</sup>, Neha Bhagwat<sup>3</sup>, Jacob E. Till<sup>3</sup>, Lotte T. Azink<sup>2</sup>, Jing Peng<sup>1</sup>, Moen Sen<sup>3</sup>, Junman Chen<sup>1</sup>, Jazmine Mays<sup>3</sup>, Erica Carpenter<sup>3</sup>, John van der Oost<sup>2\*</sup>, and Haim H. Bau<sup>1\*</sup>

1. Department of Mechanical Engineering and Applied Mechanics, University of Pennsylvania, Philadelphia PA, USA
2. Laboratory of Microbiology, Department of Agrotechnology and Food Sciences, Wageningen University, The Netherlands
3. Perelman School of Medicine, University of Pennsylvania, Philadelphia PA, USA
4. These authors contributed equally to this work.

\*Corresponding authors: [songjinz@seas.upenn.edu](mailto:songjinz@seas.upenn.edu), [john.vanderoost@wur.nl](mailto:john.vanderoost@wur.nl), [bau@seas.upenn.edu](mailto:bau@seas.upenn.edu)

## ABSTRACT

Characterization of disease-associated, cell-free nucleic acids (liquid biopsy) provides a powerful, minimally-invasive means for early detection, genotyping, and personalized therapy; but is challenged by alleles of interest differing by single nucleotide from and residing among large abundance of wild-type alleles. We describe a new multiplexed enrichment assay, dubbed NAVIGATER, that utilizes short nucleic acid-guided endonucleases Argonaute (Ago), derived from the bacterium *Thermus thermophilus* (*TtAgo*), to specifically cleave complementary DNA and RNA while sparing alleles having single nucleotide mismatches with the guides. NAVIGATER greatly increases the fractions of rare alleles of interest in samples and enhances sensitivity of downstream procedures such as ddPCR, sequencing, and clamped enzymatic amplification. We demonstrate *60-fold* enrichment of *KRAS* G12D in blood samples from pancreatic cancer patients and detection of *KRAS*, *EGFR*, and *BRAF* mutants with XNA-PCR at 0.01% fraction.

## Introduction

In recent years, researchers have identified various enzymes from archaea and bacteria that can be programmed with nucleic acids to cleave complementary strands, among which CRISPR-Cas have attracted considerable attention as genome-editing tools<sup>1-3</sup>. In medical diagnostics, CRISPR-associated nucleases have been utilized to amplify reporter signals during nucleic acid detection<sup>4-7</sup> and programmed to enrich rare alleles and enhance detection limits of oncogenic sequences<sup>8-10</sup>. Despite spectacular progress, however, a limitation of using CRISPR-Cas for diagnostics relates to the requirement of a protospacer-adjacent motif (PAM)<sup>8-10</sup>, which is absent in many sequences of interest.

Analogous to CRISPR-Cas, Argonaute (Ago) proteins<sup>11</sup> are nucleic acid-guided endonucleases. In contrast to Cas nucleases, Ago nucleases do not require the presence of a PAM and are, therefore, more versatile than CRISPR-Cas. Here, we describe a new PAM-independent, rare allele enrichment assay (**Fig. 1**) based on Ago from the thermophilic bacterium *Thermus thermophilus* (*TtAgo*) termed NAVIGATER (**N**ucleic **A**cid enrichment **V**ia DNA **G**uided **A**rgonaute from *T*hermus *t*hermophilus). *TtAgo* uses a pair of short 5'-phosphorylated single-stranded DNA oligos as guides to selectively cleave complementary double-strand (ds) alleles<sup>12-15</sup> while sparing alleles with a single nucleotide mismatch. We optimize guide length, assay composition, and incubation temperature to enable NAVIGATER to increase rare allele fractions of *KRAS*, *EGFR*, and *BRAF* mutants in various samples. Furthermore, we demonstrate that NAVIGATER improves the sensitivity of downstream detection schemes such as droplet digital PCR (ddPCR)<sup>16</sup>, Peptide Nucleic Acid-Mediated PCR (PNA-PCR)<sup>17</sup>, PNA-Loop Mediated Isothermal Amplification (LAMP)<sup>18</sup>, and Sanger sequencing. As liquid biopsy (LB), especially monitoring of somatic mutations through cell-free DNA, becomes more common, methods such as NAVIGATER for enhancing sensitivity of non-invasive detection of critical diagnostic information will improve the clinical utility of such tests.

## Results

### Betaine, Mg<sup>2+</sup>, and dNTPs enhance *TtAgo*'s cleavage of targeted nucleic acids

We envision applying NAVIGATER in combination with enzymatic amplification, in either a single-stage or a two-stage process, for rapid, inexpensive genotyping of rare mutant alleles (MAs). Of particular interest is LAMP since it does not require temperature cycling and can be implemented

with simple instrumentation in resource poor settings. We tested *TtAgo*'s activity in three modified variants of LAMP buffers and in a previously described custom cleaving Buffer S<sup>15</sup> (**Table 1**).

We incubated *TtAgo* with either ssDNA or ssRNA fragments (100 nt) of the human *KRAS* gene and a 16 nt guide with a perfect match to the wild type (WT) *KRAS*, but with a single nucleotide mismatch at guide position-12 (g12) with *KRAS*-G12D. Cleavage products were subjected to gel electrophoresis (**Supplementary Section 1**). We define the cleavage efficiency as  $\Gamma = I_C / (I_C + I_{UC})$ , where  $I_C$  and  $I_{UC}$  are, respectively, band intensities of cleaved and uncleaved alleles. Comparing the targeting in different buffers revealed that the cleavage efficiency in buffer 3 is very high (nearly 100%) for both WT DNA and WT RNA targets and very low (<1%) for MAs (**Fig. 2**, and **Supplementary Figs. 1b, 3b**).

Next we set out to reveal why buffer 3 outperform the other buffers tested. Unlike other buffers, buffer 3 contains betaine, dNTPs, and  $4 \times [Mg^{2+}]$  (8 mM vs 2 mM). To examine the effect of each of these additives on *TtAgo*'s activity, we varied each additive's concentration in Buffers 2 and S. As the  $[Mg^{2+}]$  in Buffer S and Buffer 2 increases, so does  $\Gamma_{WT\ DNA}$  at 80 °C, achieving nearly 100% at  $[Mg^{2+}] \sim 6$  mM (**Fig. 2b** and **Supplementary Figs. 1a**). Increase in  $[Mg^{2+}]$  has little effect on  $\Gamma_{WT\ DNA}$  at 70 °C (**Supplementary Fig. 1c**).  $\Gamma_{WT\ RNA}$  increases as  $[Mg^{2+}]$  increases at both 70 °C and 80 °C (**Fig. 2c** and **Supplementary Fig. 3**). Divalent cations, such as  $Mg^{2+}$  are essential for endonucleolytic activity<sup>14,15,19,20</sup> and stabilize the *TtAgo*-guide-target ternary complex<sup>20</sup>.

Betaine significantly increases  $\Gamma_{WT\ DNA}$  (**Fig. 2b** and **Supplementary Figs. 1a**) but increases  $\Gamma_{WT\ RNA}$  to a lesser degree (**Fig. 2d**). Buffer S supplemented with both  $Mg^{2+}$  (6 mM) and betaine (0.8 M) increased the *TtAgo* cleavage efficiency from 60% to nearly 100% (**Supplementary Fig. 1a**) at 80 °C. This is consistent with betaine's ability to increase thermal stability of polymerase enzymes<sup>21</sup> and to dissolve secondary GC structure<sup>22</sup> during DNA amplification. Addition of 1.4 mM dNTPs increases  $\Gamma_{WT\ DNA}$  to  $\sim 100\%$  at 80 °C (**Supplementary Fig. 1a**) similar to betaine's effect.

At 80 °C and in the absence of dNTPs, the  $\Gamma_{WT\ RNA}$  peaks at  $[Mg^{2+}] \sim 10$  mM (**Supplementary Fig. 3a, left**). In contrast, in the presence of 1.4 mM dNTPs,  $\Gamma_{WT\ RNA}$  increases as  $[Mg^{2+}]$  increases at both 80 °C (**Supplementary Fig. 3a, right**) and 70 °C (**Supplementary Figs. 3c** and **3d**). To make sure that the beneficial effects of dNTPs are not unique to *KRAS*, we also tested cleavage efficiency of *EGFR* target sequences (**Supplementary Fig. 5a**). In the absence of dNTPs, *EGFR*  $\Gamma_{WT\ RNA} \sim 45\%$  while in the presence of 1.4 mM dATP, dTTP or dCTP,  $\Gamma_{WT\ RNA} \sim 100\%$ . Surprisingly, addition of 1.4 mM dGTP does not affect cleavage efficiency. Among NTPs, only CTP increases  $\Gamma_{WT\ RNA}$  (**Supplementary Fig. 5b**). Although the molecular basis of this

phenomenon remains elusive, it is plausible that the combination of sugar groups and nitrogenous bases of dNTPs stimulates *TtAgo*'s activity.

*TtAgo*'s activity increases at pH<9.0 (**Supplementary Fig. 5c**). Among the buffers tested, buffer 3 provides the best conditions for effective *TtAgo* cleavage of targeted WT alleles likely due to presence of betaine, dNTPs, and 8 mM [Mg<sup>2+</sup>]. Notably, *TtAgo* retains its specificity in the presence of the above additives with  $I_{MA}<1\%$ .

## Single base pair mismatch discrimination

To cleave WT alleles efficiently while sparing alleles with single nucleotide mutations, we designed guide DNA (gDNAs) with a single base pair mismatch with MAs. A mismatch in the seed region of mouse Argonaute (AGO2) has been reported to enhance the guide-allele dissociation rate<sup>23</sup>, reducing its cleaving efficiency. Little is known, however, on the effects of guide-allele mismatches on *TtAgo*'s catalytic activity. Molecular dynamic simulations predict that a single DNA guide - mRNA mismatch affects enzyme conformation and reduces activity, but agreement with experiments is imperfect<sup>24</sup>. In the absence of a reliable predictive tool, we set out to analyze the effect on enzyme activity of a single mismatch type and mismatch positions (MPs) between guides and *KRAS*, *EGFR*, and *BRAF* sequences (**Fig. 3** and **Supplementary Section 2**). We use the notation MP-x to indicate that MA's aberrant nucleotide pairs with guide's x<sup>th</sup> base, counted from guide's 5' end. Although all guides are complementary to their targets, variations in MP affected targets' cleavage locations, cleavage products' lengths, and, unexpectedly, cleaving efficiency. For example, MP-5 (**Supplementary Fig. 6c**) and MP-7 and MP-12 (**Supplementary Fig. 8b**) exhibit relatively low cleavage efficiency. This suggests that the sequence of the target-guide complex affects enzyme's conformation and activity, even when the guide and target are perfect complements.

Cleavage suppression of MAs depends sensitively on single base pair mismatch position. Mismatches in both the seed (g2-8) and mid (g9-14) regions diminished cleavage efficiency, and occasionally completely curtailed catalytic activity (**Fig. 3** and **Supplementary Section 2**). For example, *KRAS*- antisense (AS) guides (15 nt) MP8-MP14 cleaved *KRAS* G12D AS (**Supplementary Fig. 6c**) and *KRAS*- S (16 nt) guides MP7 and MP11-MP13 cleaved *KRAS* G12D - S (**Supplementary Fig. 3c**) with  $I_{DNA\ MA}<4\%$ , while MP6 has  $I_{DNA\ MA}>40\%$ .

We define discrimination efficiency (DE) as the difference between *TtAgo*-guide complex cleaving efficiency of WT and that of MA (**Fig. 3d** and **Supplementary Fig. 14**). Mismatches at and around the cleavage site (g10/g11), especially at MP7 and MP9-MP13 yielded the greatest

discrimination (DE>80%) for most cases examined (**Fig. 3e**). The optimal MP depends, however, on the allele's sequence. Cleavage of RNA was more sensitive to MP than cleavage of DNA. Single mismatches at position g4-g11 nearly completely prevented RNA cleavage (**Supplementary Figs. 6e and 9**). Our data suggests that guide's sequence differently affects the conformation of the ternary *TtAgo*-gDNA-DNA and *TtAgo*-gDNA-RNA complexes<sup>19</sup>.

### **Short DNA guides (15/16 nt) provide best discrimination between WT and MA**

*In vitro*, *TtAgo* has been reported to operate with ssDNA guides ranging in length from 7 to 36 nt<sup>13</sup>. Heterologously-expressed *TtAgo* is typically purified with DNA guides ranging in length from 13 to 25 nt<sup>15</sup>. Since little is known on the effect of guide's length on *TtAgo*'s discrimination efficiency (DE), we examine the effect of guide's length on DE in our in-vitro assay. *TtAgo* efficiently cleaves WT *KRAS* with complementary guides, ranging in length from 16 to 21 nt at both 70 °C and 75 °C (**Fig 4a-i** and **Supplementary Fig. 15a-i**). Guides of 17-21 nt length with a single nucleotide mismatch MP12 cleave MAs at 75°C but not at 70°C (**Fig 4a-i, top left**). Cleavage of MA at 75 °C is, however, completely suppressed with a short 16 nt guide (**Fig 4a-i**). We observe a similar behavior with guides with single mismatches at other positions (**Supplemental Fig. 16**) and with other MA sequences (**Fig 4a-ii**). Apparently, *TtAgo* with shorter guides form a less stable complex with off-targets than longer guides thus preventing undesired cleavage.

In contrast to MA DNA, the increase in temperature did not increase undesired cleavage of MA RNA (**Figs. 4a-i, bottom and 4b-ii**), likely due to differences in the effects of ssDNA and ssRNA on enzyme conformation. When operating with a short 16 nt guide, single MP12 mismatch, and LAMP buffer 3, *TtAgo* efficiently cleaves both WT RNA and DNA targets while avoiding cleavage of MAs between 66 °C and 86 °C (**Fig. 4c**), providing the high specificity that is crucial for an enrichment assay.

### ***TtAgo* efficiently cleaves targeted dsDNA only at temperatures above the dsDNA's melting temperature**

Guide-free *TtAgo* can degrade dsDNA at low temperatures, and self-generate and selectively load functional DNA guides<sup>25</sup>. This is, however, a slow process that takes place only when target DNA is rich in AT (<17% GC)<sup>15</sup>, suggesting that *TtAgo* lacks helicase activity and depends on dsDNA thermal breathing to enable chopping<sup>11,15,26</sup>. Furthermore, since our assay is rich in gDNA that forms a tight complex with *TtAgo*, *TtAgo*'s direct interactions with dsDNA are suppressed.

*TtAgo*'s ability to operate at high temperatures provides NAVIGATER with a clear advantage since dsDNA unwinds as the incubation temperature increases.

Here, we investigate *TtAgo*'s cleavage efficiency of ds*KRAS* WT and MA as functions of incubation temperature in the presence of abundant gDNA. The estimated melting temperature of 100 bp ds*KRAS* (S strand sequence listed in **Fig. 3a**) in buffer 3 is 79.7 °C<sup>27</sup>. Consistent with this estimate, very little cleavage takes place at temperatures under 80 °C, but *TtAgo* cleaves dsDNA efficiently at temperatures above 80°C (**Fig. 5a**). Target cleavage efficiency increases as the incubation time increases and saturates after about one hour (**Figs. 5c** and **5d**). Lengthier incubation time is undesirable as it leads to cleavage of MAs. For efficient discrimination between WT and MA, it is desired to incubate the assay at temperatures exceeding the target melting temperature for about one hour.

### **Excess gDNA concentration is necessary to avoid off-target cleavage**

At *TtAgo*:S-guide:AS-guide ratio of 1: 0.2: 0.2, non-specific, undesired cleavage of dsMA occurs (**Fig. 5b**). This off-target cleaving becomes more pronounced as the incubation time increases (**Fig. 5b**) and can potentially be attributed to *TtAgo*'s self-production of guides from dsDNA (chopping)<sup>25</sup>. Since gDNA forms a tight complex with *TtAgo*, excess gDNA reduces undesired chopping. When guide concentrations exceed *TtAgo* concentration, no apparent off-target cleavage takes place (**Figs. 5c, 5d** and **Supplementary Fig. 17**). To avoid off-target cleaving, it is necessary to saturate *TtAgo* with guides and limit incubation time.

At *TtAgo*:S-guide:AS-guide ratio of 1: 10: 10, NAVIGATER also allows for enriching other double strand MAs harboring point mutations such as *BRAF* V600E and *EGFR* L858R (**Supplementary Figs. 18**), or MAs harboring deletion mutations (**Supplementary Fig. 19**).

### **NAVIGATER improves the sensitivity of downstream rare allele detection**

In recent years, there has been a rapidly increasing interest in applying LB to detect cell-free circulating nucleic acids associated with somatic mutations for, among other things, cancer diagnostics, tumor genotyping, and susceptibility monitoring to targeted therapies. LB is attractive since it is minimally invasive and relatively inexpensive. Detection of MAs is, however, challenging due to their very low concentrations in LB samples among the background of highly abundant WT alleles that differ from MAs by as little as a single nucleotide. To improve the sensitivity and specificity of detecting rare alleles that contain valuable diagnostic and therapeutic clues, it is necessary to remove and/or suppress the amplification of WT alleles<sup>28-30</sup>. NAVIGATER meets this



challenge by selectively and controllably degrading WT alleles in the sample to increase the fraction of MAs of interest. We show that NAVIGATER increases sensitivity of downstream mutation detection methods such as gel electrophoresis, ddPCR<sup>16</sup>, PNA-PCR<sup>17</sup>, PNA-LAMP<sup>18</sup>, and Sanger sequencing. We also illustrate its capability for multiplexing enrichment of MAs. Furthermore, to demonstrate NAVIGATER's potential clinical utility, we enriched blood samples from pancreatic cancer patients, which have been previously analyzed with standard ddPCR protocol (**Table 2**). These samples were pre-amplified by PCR increasing WT and MA *KRAS* total content before enrichment.

**Gel electrophoresis (Supplementary Fig. 20):** In the absence of enrichment (control), the bands at 80 bp (*KRAS*) on the electropherogram are strong. After 40 minutes of *TtAgo* enrichment, these bands faded, indicating a reduction of *KRAS* WT alleles. After 2 hours enrichment, all the bands at 80 bp, except that of patient P6, have essentially disappeared, suggesting that most WT alleles have been cleaved. The presence of an 80 bp band in the P6 lane is attributed to the relatively high (20%) MA fraction that is not susceptible to cleaving. We also PCR amplified products from a 2-hour NAVIGATER treatment, and subjected the amplicons to a second NAVIGATER for 2h. The amplicon's electropherogram reveals the presence of MAs in samples P3, P4, and P6 (**Supplementary Fig. 20**) based on darkness difference of the bands, demonstrating that NAVIGATER renders observable otherwise undetectable MAs.

**ddPCR:** To quantify our enrichment assay products, we employed ddPCR (**Supplementary Fig. 21**). When operating with a mixture of WT and MA, NAVIGATER products include: residual uncleaved WT ( $N_{WT}$ ), MA ( $N_{MA}$ ), and WT-MA hybrids ( $N_H$ ). Hybrid alleles form during re-hybridization of an ssWT with an ssMA. The MA fraction is  $f_{MA} = (N_{MA} + \frac{1}{2}N_H) / (N_{WT} + N_{MA} + N_H)$ .

We carried out ddPCR on un-enriched (control, NAVIGATER without *TtAgo*), once-enriched, and twice-enriched samples (**Supplementary Fig. 21b**), increasing  $f_{MA}$  significantly (**Fig. 6a**). For example,  $f_{MA}$  increased from 0.5% in the un-enriched P5 (G12D) sample to ~30% in the twice-enriched sample. This represents a ~60 fold increase in the fraction of droplets ( $f_{MA}$ ) containing MA (**Fig. 6b**). The same assay also enriched G12R, increasing  $f_{MA}$  from 3% to ~66% in sample P3 and G12V, increasing  $f_{MA}$  from 5% to ~68% in sample P4 (**Fig. 6b**).

**PNA-PCR:** PNA-PCR utilizes a sequence-specific PNA blocker that binds to WT alleles, suppressing WT amplification and providing a typical limit of detection of  $f_{MA} \sim 1\%$ <sup>17</sup>. To demonstrate NAVIGATER's utility, we compared the performance of PNA-PCR when processing pancreatic cancer patient samples (**Table 2**) before and after NAVIGATER (**Figs. 6c, 6d, and 6e**). Before enrichment, PNA-PCR real-time amplification curves in the order of appearance are P6, P4,



and P3, as expected (**Table 2**). Samples P1 ( $f_{MA}=0$ ), P2 ( $f_{MA}=0$ ), and P5 ( $f_{MA}=0.5\%$ ) nearly overlap, consistent with a detection limit of  $\sim 1\%$ <sup>17</sup>. Enrichment (**Fig. 6d**) significantly increases the threshold times of samples P1 and P2, revealing the presence of MAs in sample P5. PNA-PCR combined with NAVIGATER provides the linear relationship  $T_{1/2} = 22.9 - 5 \log(f_{MA})$  between threshold time (the time it takes the amplification curve to reach half its saturation value) and allele concentration (**Fig. 6e**), allowing one to estimate MA concentration. The data suggests that NAVIGATER can stretch the PCR-PNA limit of detection to below 0.1%.

**PNA-LAMP:** Genotyping with PNA blocking oligos can also be combined with isothermal amplification PNA-LAMP<sup>18</sup>. To demonstrate the feasibility of genotyping at the point of care and resource-poor settings, we use a minimally-instrumented, electricity-free Smart-Connected Cup (SCC)<sup>31</sup> with smartphone and bioluminescent dye-based detection to incubate PNA-LAMP and detect reaction products. To demonstrate that we can also detect RNA alleles, we tested simulated samples comprised of mixtures of WT *KRAS* mRNA and *KRAS*-G12D mRNA. In the absence of pre-enrichment, SSC is unable to detect the presence of 0.1% *KRAS*-G12D mRNA whereas with pre-enrichment 0.1% *KRAS*-G12D mRNA is readily detectable (**Fig. 6f**).

**Sanger Sequencing:** In the absence of enrichment, Sanger sequencers detect  $>5\%$  MA fraction<sup>32</sup>. The Sanger sequencer failed to detect the presence of  $f_{MA} \sim 3\%$  and 0.5% *KRAS*-G12D mRNA in our un-enriched samples, but readily detected these MAs following NAVIGATER enrichment (**Fig. 6g**).

**Multiplexing NAVIGATER:** Triplex enrichment of MAs by NAVIGATER was evaluated by gel electrophoresis and commercial XNA-PCR kits<sup>33</sup> (**Supplementary Section 5**). The results show that triplex NAVIGATER increases sensitivity of XNA-PCR around one order of magnitude for each mutant target. With input of 60 ng cfDNA, 0.01% of *KRAS* G12D (**Figs. 6h and 6i**) and *EGFR*  $\Delta E746 - A750$ , and 0.1% of *EGFR* L858R can be readily detected by XNA-PCR after enrichment (**Supplementary Fig. 23**).

## Discussion

LB is a simple, minimally invasive, rapidly developing diagnostic method to analyze cell-free nucleic acid fragments in body fluids and obtain critical diagnostic information on patient health and disease status. Liquid biopsy can help personalize and monitor treatment for patients with advanced cancer, although sensitivity of commercially available tests is not yet sufficient for patients with earlier stage disease<sup>30</sup> or for cancer screening. Their detection is challenging as they co-occur with high concentrations of background nucleic acids that differ from the alleles of interest by as little as a single nucleotide, which challenges detection.

Here, we report a novel enrichment method (NAVIGATER) for rare alleles that uses *TtAgo*. *TtAgo* is programmed with short DNA guides to specifically cleave guide-complementary alleles and stringently discriminate against off-targets with a single nucleotide precision. Sequence mismatches between guide and off-targets reduce hybridization affinity and cleavage activity by sterically hindering the formation of a cleavage-compatible state<sup>13,14</sup>. We observe that *TtAgo*'s activity and discrimination efficiency depend sensitively on (i) the position of the mismatched pair along the guide, (ii) the buffer composition, (iii) the guide concentration, (iv) the guide length, (v) the incubation temperature, (vi) the assay time, and (vii) the target sequence. *TtAgo* appears to discriminate best between target and off-target in the presence of a mismatch at or around the cleavage site located between guide nucleotides 10 and 11. Optimally, the buffer should contain  $[Mg^{2+}] \geq 8$  mM, 0.8 M betaine, and 1.4 mM dNTPs. In addition, ssDNA guides should be 15-16nt in length with their concentration exceeding *TtAgo*'s concentration; and the incubation temperature should exceed the dsDNA melting temperature.

We demonstrate NAVIGATER's ability to enrich the fraction of cancer biomarkers such as *KRAS*, *BRAF*, and *EGFR* mutants in various samples. For example, NAVIGATER increased *KRAS* G12D fraction from 0.5% to 30% (60 fold) in a blood sample from a pancreatic cancer patient. The presence of 0.5% *KRAS* G12D could not be detected with Sanger sequencer or PNA-PCR. However after NAVIGATER pre-processing, both the Sanger sequencer and PNA-PCR readily identified the presence of *KRAS* G12D. Additionally, NAVIGATER combined with PNA-LAMP detects low fraction (0.1%) mutant RNA alleles and NAVIGATER combined with PNA-LAMP enables genotyping at the point of care and in resource-poor settings. NAVIGATER enables multiplexing MAs enrichment, and followed with XNA-PCR can detect rare alleles with frequencies as low as 0.01%.

NAVIGATER differs from previously reported rare allele enrichment methods<sup>8-10,34-38</sup> in several important ways. First, NAVIGATER is versatile. In contrast to CRISPR-Cas9<sup>8-10</sup> and restriction enzymes<sup>34</sup>, *TtAgo* does not require a PAM motif or a specific recognition site. A gDNA can be designed to direct *TtAgo* to cleave any desired target. Second, *TtAgo* is a multi-turnover enzyme<sup>15</sup>; a single *TtAgo*-guide complex can cleave multiple targets. In contrast, CRISPR-Cas9 is a single turnover nuclease<sup>39</sup>. Third, whereas CRISPR-Cas9 exclusively cleaves DNA, *TtAgo* cleaves both DNA and RNA targets with single nucleotide precision. Hence, NAVIGATER can enrich for both rare DNA alleles and their associated exosomal RNAs<sup>40</sup>, further increasing assay sensitivity. Fourth, *TtAgo* is robust, operates over a broad temperature range (66-86 °C) and unlike PCR-based enrichment methods, such as COLD-PCR<sup>36</sup> and blocker-PCR<sup>37,38</sup>, does not require tight

temperature control. Moreover, NAVIGATER can complement PCR-based enrichment methods. Fifth, *TtAgo* is more specific than thermostable duplex-specific nuclease (DSN)<sup>35</sup>. Since DSN non-specifically cleaves all dsDNA, DSN-based assays require tight controls of probe concentration and temperature to avoid non-specific hybridization and cleavage of the rare nucleic acids of interest. Most importantly, as we have demonstrated, NAVIGATER is compatible with many downstream genotyping analysis methods such as ddPCR, PNA-PCR, and sequencers. Last but not least, the *TtAgo*-based approach can operate with isothermal amplification methods such as LAMP, enabling integration of enrichment with genotyping for use in resource poor settings.

In the future, we will design panels of DNA guides to enable NAVIGATER in combination with downstream detection methods (including next-generation sequencing) to detect MAs indicative of various types of cancer. NAVIGATER could be leveraged to help detect other rare MA such as genetic disorders in fetal DNA and drug resistant bacteria.

## Acknowledgements

Dr. Robert M. Greenberg helped with PAGE electrophoresis. Dr. Jennifer E. Phillips-Cremins provided us access to gel imager. Dr. Changchun Liu provided helpful comments early in this project. Stephanie Yee and Taylor Black assisted with ddPCR experiments. Junman Chen assisted with XNA-PCR experiments. This work is supported by the NIH NCI **1R21CA227056-01**, and by grants from the Netherlands Organization of Scientific Research (NWO-ECHO 711013002 and NWO-TOP 714015001) to J.v.d.O.

## Author contributions

J.S. and H.H.B. conceived the project and designed the experiments. J.W.H. expressed and purified *TtAgo* protein. J.S., J.W.H., J.P. and L.T.A. carried out the experiments. M.G.M. assisted with PNA-PCR. J.C. assisted with XNA-PCR. N.B. and J.E.T. extracted cfDNA from patients' blood and quantified *KRAS* G12 mutations with ddPCR. J.E.T. extracted RNA from cell lines. N.B. and J.E.T. assisted with ddPCR experiments. M.S. and J.M. cultured cell lines. E.C. supervised N.B., J.E.T., M.S., and J.M. and advised on ddPCR experiments. J.S., J.W.H., M.G.M., J.v.d.O., and H.H.B. analyzed the data and wrote the manuscript. All authors read and commented on the manuscript.

## Competing interests

University of Pennsylvania and Wageningen University have applied for a patent on NAVIGATER with J.S., J.W.H., M.G.M., J.v.d.O., and H.H.B. listed as co-inventors.

## Human Subjects

This study was approved by Penn Institutional Review Board (IRB PROTOCOL #: 822028)

## Methods

### ***TtAgo* expression and purification**

*TtAgo* gene, codon-optimized for *E. coli* BL21 (DE3), was inserted into a pET-His6 MBP TEV cloning vector (Addgene plasmid # 29656) using ligation-independent cloning. The *TtAgo* protein was expressed in *E. coli* BL21(DE3) Rosetta™ 2 (Novagen). Cultures were grown at 37 °C in Lysogeny broth medium containing 50 µg ml<sup>-1</sup> kanamycin and 34 µg ml<sup>-1</sup> chloramphenicol until an OD<sub>600nm</sub> of 0.7 was reached. *TtAgo*-expression was induced by addition of isopropyl β-D-1-thiogalactopyranoside (IPTG) to a final concentration of 0.1 mM. During the expression, cells were incubated at 18 degrees for 16 hours with continuous shaking. Cells were harvested by centrifugation and lysed in buffer containing 20 mM Tris-HCl pH 7.5, 250 mM NaCl, 5mM imidazole, supplemented with EDTA-free protease inhibitor cocktail tablet (Roche). The soluble fraction of the lysate was loaded on a nickel column (HisTrap Hp, GE healthcare). The column was extensively washed with buffer containing 20 mM Tris-HCl pH 7.5, 250 mM NaCl and 30 mM imidazole. Bound proteins were eluted by increasing the concentration of imidazole in the wash buffer to 250 mM. The eluted protein was dialysed at 4°C overnight against 20 mM HEPES pH 7.5, 250 mM KCl, and 1 mM dithiothreitol (DTT) in the presence of 1 mg TEV protease (expressed and purified as previously described<sup>41</sup>) to cleave the His6-MBP tag. Next, the cleaved protein was diluted in 20 mM HEPES pH 7.5 to lower the final salt concentration to 125 mM KCl. The diluted protein was applied to a heparin column (HiTrap Heparin HP, GE Healthcare), washed with 20mM HEPES pH 7.5, 125 mM KCl and eluted with a linear gradient of 0.125-2 M KCl. Next, the eluted protein was loaded onto a size exclusion column (Superdex 200 16/600 column, GE Healthcare) and eluted with 20 mM HEPES pH7.5, 500 mM KCl and 1 mM DTT (**Supplementary Fig. 24**). Purified *TtAgo* protein was diluted in a size exclusion buffer to a final concentration of 5 µM. Aliquots were flash frozen in liquid nitrogen and stored at -80°C.

### ***TtAgo* – based cleavage assays**

5'-Phosphorylated DNA guides and Ultramer® ssDNA and ssRNA targets (100 nt) were synthesized by IDT (Coralville, IA). For ssDNA and ssRNA cleavage experiments, purified *TtAgo*, DNA guides, and ssDNA or ssRNA targets were mixed in 1:0.2 :0.2 ratio (1.25 µM *TtAgo*,

0.25  $\mu$ M guide, 0.25  $\mu$ M target) in the buffers listed in **Table 1**. Reaction mixtures were incubated for 20 min at the indicated temperatures. Reactions were terminated by adding 1  $\mu$ L proteinase K (Qiagen, Cat. No. 19131) solution, followed by 15 min incubation at 56°C. Samples were then mixed with 2X loading buffer (95% (de-ionized) formamide, 5mM EDTA, 0.025% SDS, 0.025% bromophenol blue and 0.025% xylene cyanol) and heated for 10 min at 95°C before the samples were resolved on 15% denaturing polyacrylamide gels (7M Urea). Gels were stained with SYBR gold Nucleic Acid Gel Stain (Invitrogen) and nucleic acids were visualized using a BioRad Gel Doc XR+ imaging system. For dsDNA cleavage, *TtAgo* and guides were pre-incubated in LAMP buffer 3 (**Table 1**) at 75 °C for 20 min. Cleavage was carried out with various indicated *TtAgo*/(S-guide)/(AS-guide) concentration ratios and time.

### **Patient circulating cell-free DNA (cfDNA) and Cell line RNA Samples**

Patient cfDNA samples. All 6 blood samples were obtained from patients with metastatic pancreatic cancer who had provided informed consent under the IRB-approved protocol (UPCC 02215, IRB# 822028). cfDNA was extracted with QIAamp<sup>®</sup> Circulating Nucleic Acid kit (Qiagen, Valencia, CA, USA). Subsequently, the extracted cfDNA was qualified and quantified with multiplex ddPCR (Raindance). The *KRAS* genotype and mutation frequency in these 6 samples are listed in **Table 2**.

RNA samples. Total RNA was extracted with RNeasy<sup>®</sup> mini kit (Qiagen, Valencia, CA, USA) per manufacturer's protocol from Human cancer cell lines U87-MG (WT *KRAS* mRNA) and ASPC1 (*KRAS* G12D mRNA). *KRAS* mRNA was quantified with ddPCR.

### ***TtAgo*-based mutation enrichment**

cfDNA pre-amplification was carried out in 50- $\mu$ L reaction volumes using 20 ng of cfDNA, 1  $\times$  Q5 Hot Start High-Fidelity Master Mix (New England Biolabs, Ipswich, MA), and 100 nM each of forward and reverse *KRAS* 80 bp-PCR primers (**Supplementary Table 1**). Reactions without DNA were included as no template (negative) controls (NTCs). Nucleic acids were preamplified with a BioRad Thermal Cycler (BioRad, Model CFD3240) with a temperature profile of 98°C for 3 minutes, followed by 30 cycles of amplification (98°C for 10 seconds, 63°C for 3 minutes, and 72°C for 30 seconds), and a final 72 °C extension for 2 minutes.

***mRNA pre-amplification*** was performed in 50- $\mu$ L reactions using 30 ng of total RNA, 1  $\times$  Q5 Hot Start High-Fidelity Master Mix (New England Biolabs, Ipswich, MA), 100 nM each of forward and reverse *KRAS* 295 bp-PCR primers (**Supplementary Table 1**), and 1  $\mu$ L reverse transcriptase (Invitrogen, Carlsbad, CA). The reaction mix was incubated at 55 °C for 30 minutes and 98°C for 3 minutes, followed by 30 cycles of amplification (93°C for 15 seconds, 62°C for 30 seconds, and 72°C for 30 seconds), and a final 72°C extension for 4 minutes.

***Mutation enrichment (NAVIGATER)***. The same setup as for synthetic dsDNA cleavage was used for cf-ctDNA and mutant mRNA enrichment. *TtAgo*, S-guide, and AS-guide were mixed in 1: 10: 10 ratio (1.25  $\mu$ M *TtAgo*, 12.5  $\mu$ M S-guide, 12.5  $\mu$ M AS-guide) in the buffer 3 and pre-incubated at 75 °C for 20 min. Samples consisted of 2  $\mu$ L preamplified PCR or RT-PCR products were added after pre-incubation of *TtAgo* and guides. The reaction mixes were incubated at 83°C for 1 hour. The enriched products were diluted  $10^4$  times before downstream mutation analysis or second-round enrichment. For second-round enrichment, the protocol outlined above was repeated. Instead of using preamplified PCR or RT-PCR products,  $10^4$ -fold diluted first-round enriched products were used.

### **NAVIGATER combined with downstream mutation detection methods**

***Droplet digital PCR (ddPCR)***. ddPCR was carried out with the RainDrop Digital PCR system (RainDance Technologies, Inc.) to verify mutation abundance before and after *TtAgo* enrichment. 2  $\mu$ L of the  $10^4$ -fold diluted, *TtAgo*-treated sample was added to each 30- $\mu$ L dPCR. dPCRs contained 1 $\times$  TaqMan Genotyping Master Mix (Life Technologies), 400 nM *KRAS* 80bp-PCR primers, 100 nM *KRAS* wild-type target probe, 100 nM *KRAS* mutant target probe (**Supplementary Table 1**), and 1 $\times$  droplet stabilizer (RainDance Technologies, Inc.). Emulsions of each reaction were prepared on the RainDrop Source instrument (RainDance Technologies, Inc.) to produce 2 to 7 million, 5-pL-volume droplets per 25- $\mu$ L reaction. Thereafter, the emulsions were placed in a thermal cycler to amplify the target and generate signal. The temperature profile for amplification consisted of an activation step at 95°C for 10 minutes, followed by 45 cycles of amplification [95°C for 15 seconds and 60°C for 45 seconds]. Reaction products were kept at 4°C before placing them on the RainDrop Sense instrument (RainDance Technologies, Inc.) for signal detection. RainDrop Analyst (RainDance Technologies, Inc.) was used to determine positive signals for each allele type. Gates were applied to regions of clustered droplets to define positive hits for each allele, according to the manufacturer's instructions.



**PNA-PCR.** PNA-PCR was performed in 20- $\mu$ L reaction volumes, containing 4.5  $\mu$ L of the  $10^4$ -fold diluted *TtAgo*-treated products, 1  $\times$  Q5 Hot Start High-Fidelity Master Mix (New England Biolabs, Ipswich, MA), 0.5  $\mu$ L of EvaGreen fluorescent dye (Biotium, Hayward, CA), 500 nM *KRAS* PNA clamp (**Supplementary Table 1**), and 100 nM each of forward and reverse *KRAS* 80 bp-PCR primers. Reactions were amplified with a BioRad Thermal Cycler (BioRad, Model CFD3240) with a temperature profile of 98 °C for 3 minutes, followed by 40 cycles of amplification (98 °C for 10 seconds, 63 °C for 3 minutes, and 72 °C for 30 seconds).

**Sanger sequencing.** RNA extracted from cell lines were pre-amplified by *KRAS* 295 bp-PCR primers as described above and treated by *TtAgo* mutation enrichment system. 2  $\mu$ L of the  $10^4$ -fold diluted, *TtAgo*-treated sample was amplified by 295 bp PCR protocol (the same as 295 bp RT-PCR protocol without a reverse transcription step) for 30 cycles. PCR products were checked for quality and yield by running 5  $\mu$ L in 2.2% agarose Lonza FlashGel DNA Cassette and processed for Sanger sequencing at Penn Genomic Analysis Core.

**POC mutation detection.** PNA-LAMP (SMAP-2) was prepared in 20- $\mu$ L reaction volumes according to previously described protocol<sup>18</sup>. The reaction mix contained 2  $\mu$ L of the  $10^4$ -fold diluted *TtAgo*-treated products (the same ones as used for Sanger sequencing), 1  $\times$  LAMP buffer 3 (Eiken LAMP buffer), 1  $\mu$ L *Bst* DNA polymerase (from Eiken DNA LAMP kit), 2.5  $\mu$ L of BART reporter (Lot: 1434201; ERBA Molecular, UK)<sup>31</sup>, *KRAS* PNA clamp and LAMP primers (sequences and concentrations listed in **Supplementary Table 1**). The prepared reaction mixtures were injected into reaction chambers of our multifunctional chip<sup>42,43</sup>. The inlet and outlet ports were then sealed with transparent tape (3M, Scotch brand cellophane tape, St. Paul, MN) and the chip was placed in our portable Smart-Connected Cup and processed according to previously described protocol<sup>31</sup>.

## REFERENCES

1. Barrangou, R. & Doudna, J.A. Applications of CRISPR technologies in research and beyond. *Nat Biotechnol* **34**, 933-941 (2016).
2. Komor, A.C., Badran, A.H. & Liu, D.R. CRISPR-Based Technologies for the Manipulation of Eukaryotic Genomes. *Cell* **168**, 20-36 (2017).
3. Wu, W.Y., Lebbink, J.H.G., Kanaar, R., Geijsen, N. & van der Oost, J. Genome editing by natural and engineered CRISPR-associated nucleases. *Nat Chem Biol* **14**, 642-651 (2018).



4. East-Seletsky, A., *et al.* Two distinct RNase activities of CRISPR-C2c2 enable guide-RNA processing and RNA detection. *Nature* **538**, 270-+ (2016).
5. Gootenberg, J.S., *et al.* Nucleic acid detection with CRISPR-Cas13a/C2c2. *Science* **356**, 438-+ (2017).
6. Chen, J.S., *et al.* CRISPR-Cas12a target binding unleashes indiscriminate single-stranded DNase activity. *Science* **360**, 436-+ (2018).
7. Gootenberg, J.S., *et al.* Multiplexed and portable nucleic acid detection platform with Cas13, Cas12a, and Csm6. *Science* **360**, 439-+ (2018).
8. Gu, W., *et al.* Depletion of Abundant Sequences by Hybridization (DASH): using Cas9 to remove unwanted high-abundance species in sequencing libraries and molecular counting applications. *Genome Biol* **17**(2016).
9. Lee, S.H., *et al.* CUT-PCR: CRISPR-mediated, ultrasensitive detection of target DNA using PCR. *Oncogene* **36**, 6823-6829 (2017).
10. Aalipour, A., *et al.* Deactivated CRISPR Associated Protein 9 for Minor-Allele Enrichment in Cell-Free DNA. *Clin Chem* **64**, 307-316 (2018).
11. Hegge, J.W., Swarts, D.C. & van der Oost, J. Prokaryotic Argonaute proteins: novel genome-editing tools? *Nat Rev Microbiol* **16**, 5-11 (2018).
12. Swarts, D.C., *et al.* The evolutionary journey of Argonaute proteins. *Nature Structural & Molecular Biology* **21**, 743-753 (2014).
13. Wang, Y.L., *et al.* Structure of an argonaute silencing complex with a seed-containing guide DNA and target RNA duplex. *Nature* **456**, 921-U972 (2008).
14. Wang, Y.L., *et al.* Nucleation, propagation and cleavage of target RNAs in Ago silencing complexes. *Nature* **461**, 754-U753 (2009).
15. Swarts, D.C., *et al.* DNA-guided DNA interference by a prokaryotic Argonaute. *Nature* **507**, 258-+ (2014).
16. Taly, V., *et al.* Multiplex Picodroplet Digital PCR to Detect KRAS Mutations in Circulating DNA from the Plasma of Colorectal Cancer Patients. *Clin Chem* **59**, 1722-1731 (2013).
17. Choi, J.J., *et al.* PNA-mediated Real-Time PCR Clamping for Detection of EGFR Mutations. *B Korean Chem Soc* **31**, 3525-3529 (2010).
18. Tatsumi, K., *et al.* Rapid Screening Assay for KRAS Mutations by the Modified Smart Amplification Process. *Journal of Molecular Diagnostics* **10**, 520-526 (2008).
19. Sheng, G., *et al.* Structure-based cleavage mechanism of Thermus thermophilus Argonaute DNA guide strand-mediated DNA target cleavage. *P Natl Acad Sci USA* **111**, 652-657 (2014).
20. Wang, Y.L., Sheng, G., Juranek, S., Tuschl, T. & Patel, D.J. Structure of the guide-strand-containing argonaute silencing complex. *Nature* **456**, 209-U234 (2008).
21. Adamczak, B., Kogut, M. & Czub, J. Effect of osmolytes on the thermal stability of proteins: replica exchange simulations of Trp-cage in urea and betaine solutions. *Phys Chem Chem Phys* **20**, 11174-11182 (2018).
22. Henke, W., Herdel, K., Jung, K., Schnorr, D. & Loening, S.A. Betaine improves the PCR amplification of GC-rich DNA sequences. *Nucleic Acids Research* **25**, 3957-3958 (1997).
23. Salomon, W.E., Jolly, S.M., Moore, M.J., Zamore, P.D. & Serebrov, V. Single-Molecule Imaging Reveals that Argonaute Reshapes the Binding Properties of Its Nucleic Acid Guides. *Cell* **162**, 84-95 (2015).
24. Joseph, T.T. & Osman, R. Convergent Transmission of RNAi Guide-Target Mismatch Information across Argonaute Internal Allosteric Network. *Plos Comput Biol* **8**(2012).
25. Swarts, D.C., *et al.* Autonomous Generation and Loading of DNA Guides by Bacterial Argonaute. *Mol Cell* **65**, 985-+ (2017).

26. Phelps, C., Lee, W., Jose, D., von Hippel, P.H. & Marcus, A.H. Single-molecule FRET and linear dichroism studies of DNA breathing and helicase binding at replication fork junctions. *P Natl Acad Sci USA* **110**, 17320-17325 (2013).
27. <https://www.idtdna.com/calc/analyser>.
28. Bettegowda, C., *et al.* Detection of Circulating Tumor DNA in Early- and Late-Stage Human Malignancies. *Sci Transl Med* **6**(2014).
29. Oxnard, G.R., *et al.* Noninvasive Detection of Response and Resistance in EGFR-Mutant Lung Cancer Using Quantitative Next-Generation Genotyping of Cell-Free Plasma DNA. *Clinical Cancer Research* **20**, 1698-1705 (2014).
30. Aggarwal, C., *et al.* Clinical Implications of Plasma-Based Genotyping With the Delivery of Personalized Therapy in Metastatic Non-Small Cell Lung Cancer. *JAMA Oncol* (2018).
31. Song, J.Z., *et al.* Smartphone-Based Mobile Detection Platform for Molecular Diagnostics and Spatiotemporal Disease Mapping. *Anal Chem* **90**, 4823-4831 (2018).
32. Tsiatis, A.C., *et al.* Comparison of Sanger Sequencing, Pyrosequencing, and Melting Curve Analysis for the Detection of KRAS Mutations Diagnostic and Clinical Implications. *Journal of Molecular Diagnostics* **12**, 425-432 (2010).
33. <http://diacarta.com>.
34. Bielas, J.H. & Loeb, L.A. Quantification of random genomic mutations. *Nat Methods* **2**, 285-290 (2005).
35. Song, C., *et al.* Elimination of unaltered DNA in mixed clinical samples via nuclease-assisted minor-allele enrichment. *Nucleic Acids Research* **44**(2016).
36. Li, J., *et al.* Replacing PCR with COLD-PCR enriches variant DNA sequences and redefines the sensitivity of genetic testing. *Nat Med* **14**, 579-584 (2008).
37. Kim, H.S., *et al.* Predictive efficacy of low burden EGFR mutation detected by next-generation sequencing on response to EGFR tyrosine kinase inhibitors in non-small-cell lung carcinoma. *PLoS One* **8**, e81975 (2013).
38. Wu, L.R., Chen, S.X., Wu, Y., Patel, A.A. & Zhang, D.Y. Multiplexed enrichment of rare DNA variants via sequence-selective and temperature-robust amplification. *Nat Biomed Eng* **1**, 714-723 (2017).
39. Sternberg, S.H., Redding, S., Jinek, M., Greene, E.C. & Doudna, J.A. DNA interrogation by the CRISPR RNA-guided endonuclease Cas9. *Nature* **507**, 62-+ (2014).
40. Krug, A.K., *et al.* Improved EGFR mutation detection using combined exosomal RNA and circulating tumor DNA in NSCLC patient plasma. *Ann Oncol* **29**, 700-706 (2018).
41. Tropea, J.E., Cherry, S. & Waugh, D.S. Expression and Purification of Soluble His6-Tagged TEV Protease. in *High Throughput Protein Expression and Purification: Methods and Protocols* (ed. Doyle, S.A.) 297-307 (Humana Press, Totowa, NJ, 2009).
42. Song, J.Z., *et al.* Molecular Detection of Schistosome Infections with a Disposable Microfluidic Cassette. *Plos Neglect Trop D* **9**(2015).
43. Song, J.Z., *et al.* Instrument-Free Point-of-Care Molecular Detection of Zika Virus. *Anal Chem* **88**, 7289-7294 (2016).

## Tables and Figures

| <b>Table 1. Buffer compositions</b>                                                                                                                     |                                                                                                                                                     |                                                                                                                                                                                    |                                                                            |
|---------------------------------------------------------------------------------------------------------------------------------------------------------|-----------------------------------------------------------------------------------------------------------------------------------------------------|------------------------------------------------------------------------------------------------------------------------------------------------------------------------------------|----------------------------------------------------------------------------|
| LAMP buffer 1<br>ThermoPol® Reaction Buffer<br>(1X, NEB)                                                                                                | LAMP buffer 2<br>Isothermal Amplification Buffer<br>(1X, NEB)                                                                                       | LAMP buffer 3<br>Eiken buffer (1X)                                                                                                                                                 | Buffer S <sup>13</sup><br>Buffer of Swarts et.al.                          |
| 20 mM Tris-HCl<br>10 mM (NH <sub>4</sub> ) <sub>2</sub> SO <sub>4</sub><br>10 mM KCl<br>2 mM MgSO <sub>4</sub><br>0.1% Triton® X-100<br>(pH 8.8 @ 25°C) | 20 mM Tris-HCl<br>10 mM (NH <sub>4</sub> ) <sub>2</sub> SO <sub>4</sub><br>50 mM KCl<br>2 mM MgSO <sub>4</sub><br>0.1% Tween® 20<br>(pH 8.8 @ 25°C) | 20 mM Tris-HCl<br>10 mM (NH <sub>4</sub> ) <sub>2</sub> SO <sub>4</sub><br>10 mM KCl<br>8 mM MgSO <sub>4</sub><br>0.1% Tween20<br>0.8 M Betaine<br>1.4 mM dNTPs<br>(pH 8.8 @ 25°C) | 10 mM Tris-HCl<br>125 mM NaCl<br>2 mM MgCl <sub>2</sub><br>(pH 8.0 @ 25°C) |

| <b>Table 2. The genotype and mutation frequency of 6 samples from pancreatic cancer patients*</b> |      |      |            |            |              |             |
|---------------------------------------------------------------------------------------------------|------|------|------------|------------|--------------|-------------|
| Patient number                                                                                    | P1   | P2   | P3         | P4         | P5           | P6          |
| Genotype and mutation fraction**                                                                  | ND** | ND** | G12R<br>3% | G12V<br>5% | G12D<br>0.5% | G12D<br>20% |
| * Samples were analyzed with standard ddPCR protocol <sup>16</sup> .                              |      |      |            |            |              |             |
| ** Not detected, possibly due to mutant allele not present.                                       |      |      |            |            |              |             |

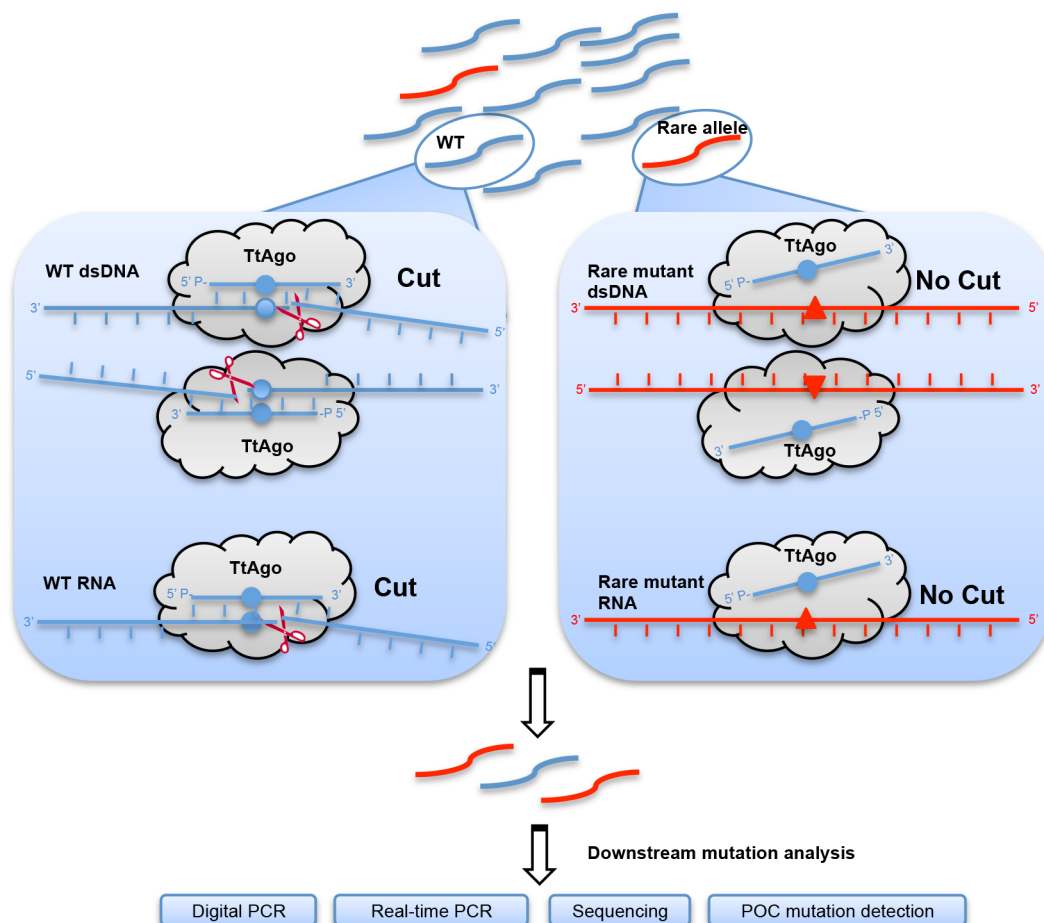

**Figure 1: Argonaute-Based Enrichment Assay for Rare Alleles (NAVIGATER)** cleaves guide-complementary targets at the cleavage site between guide positions g10 and g11 (counted from the 5' end) while sparing rare mutant alleles.

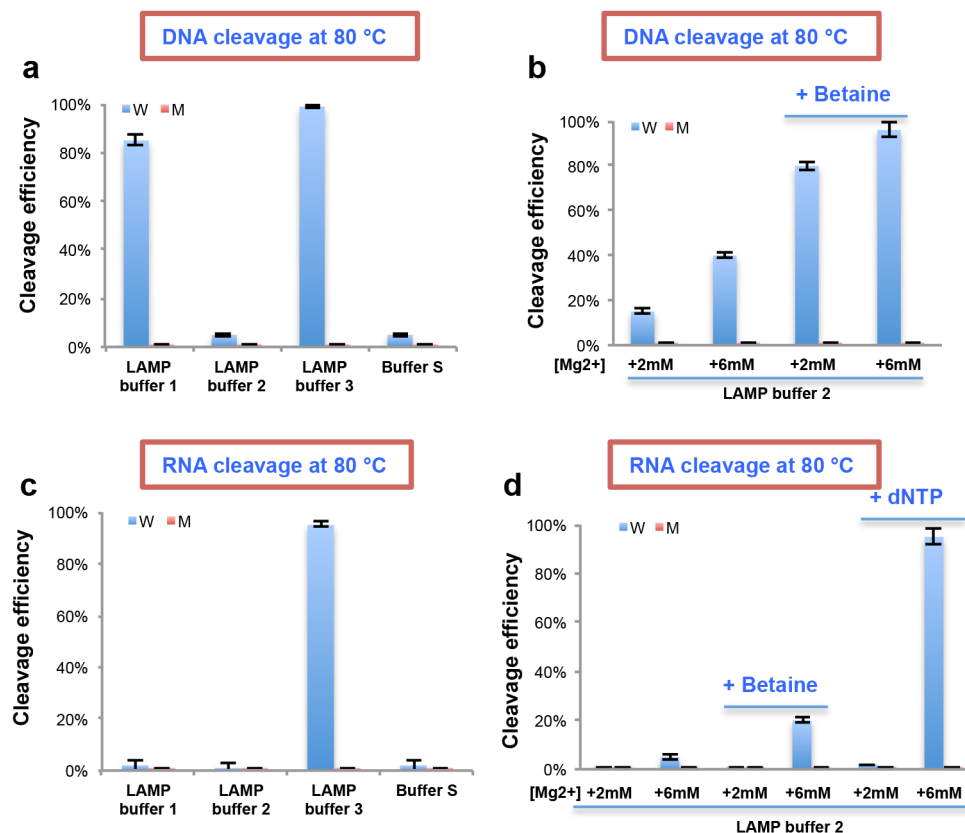

**Figure 2: Cleavage efficiency of WT *KRAS* and *KRAS* G12D in (a) Buffers 1, 2, 3, and S (Table 1) - DNA cleavage. (b) Buffer 2 with added [Mg<sup>2+</sup>] in the absence and presence of betaine (0.8 M) - DNA cleavage. (c) Buffers 1, 2, 3, and S (Table 1) - RNA cleavage. (d) Buffer 2 with added [Mg<sup>2+</sup>] in the absence and presence of betaine (0.8 M) or dNTPs (1.4 mM) - RNA cleavage. All experiments were carried out with *KRAS* Sense (S) strand and 16 nt *KRAS*-S MP12 guide at 80 °C. Incubation time 20 min. *TtAgo*: guide: target =1: 0.2: 0.2. N=3.**

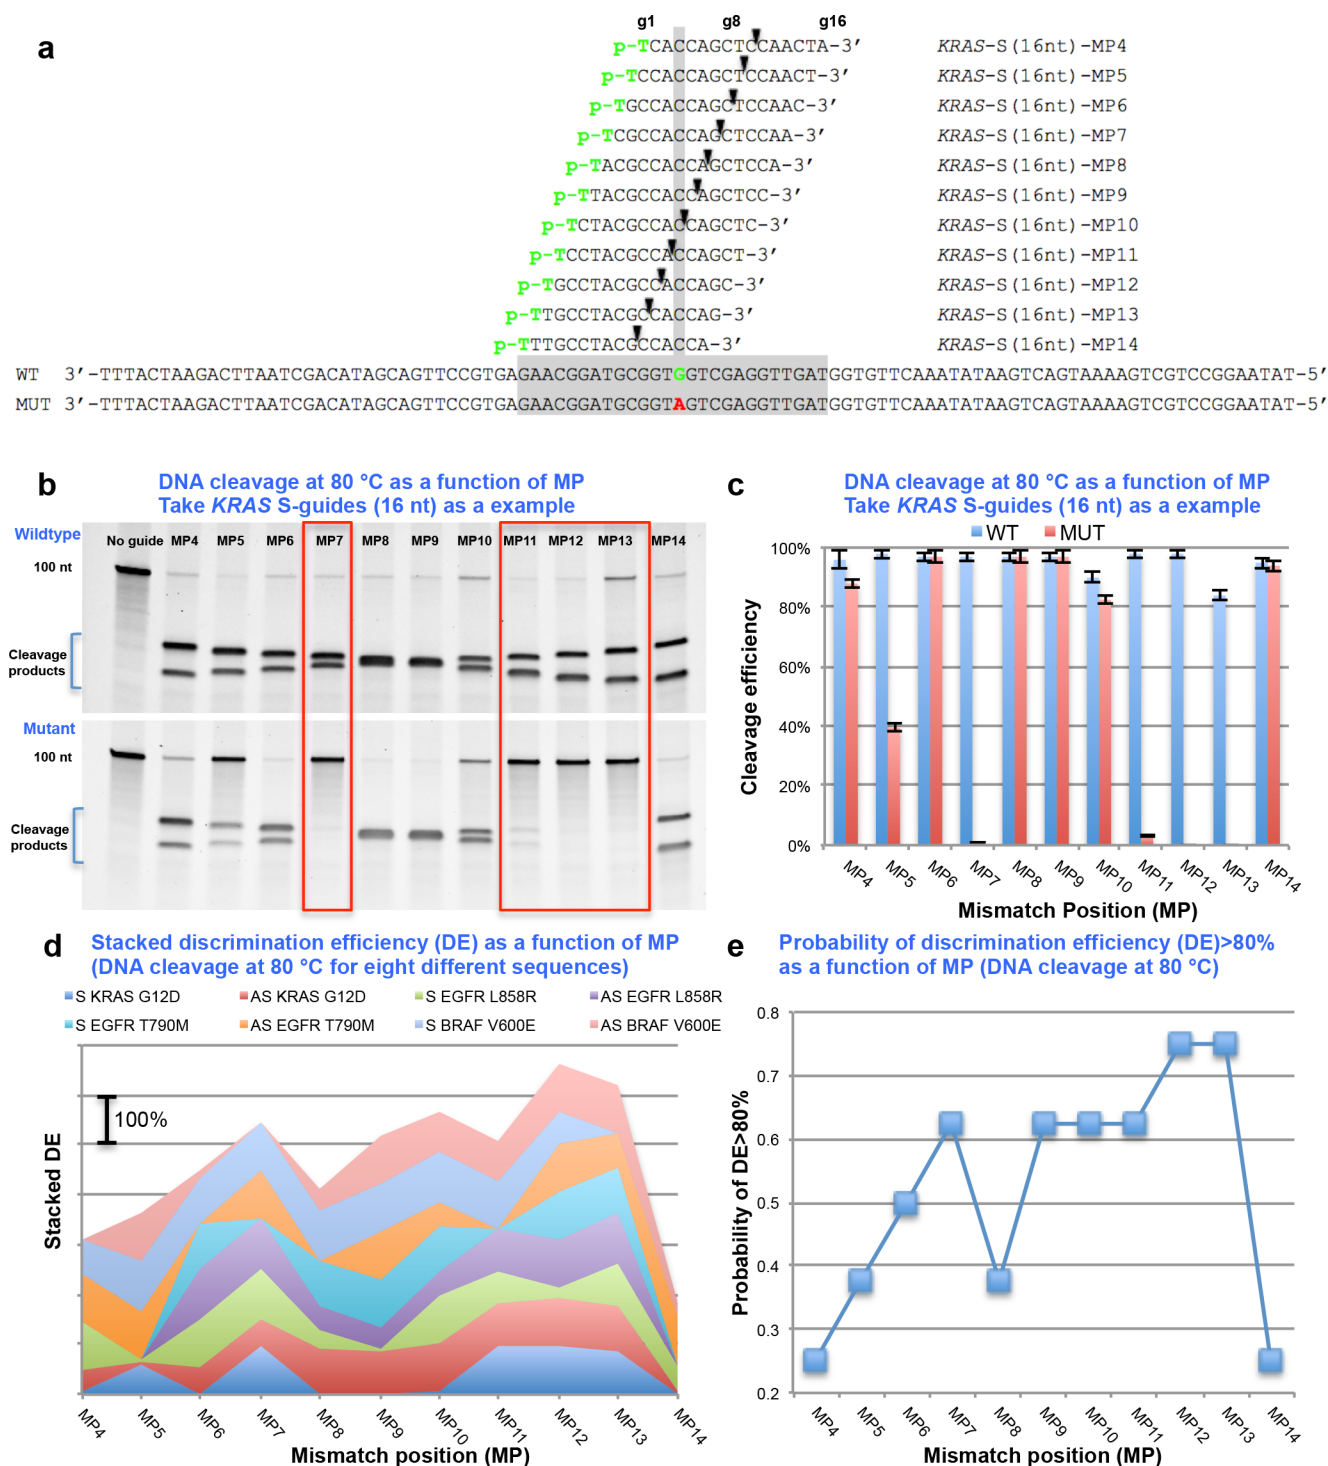

**Figure 3: NAVIGATER's discrimination efficiency depends sensitively on guide-off target mismatch pair's position.** (a) Overview of the KRAS – S guide and S target sequences. The various guides vary in the position of the pair mismatch between S gDNA and S KRAS G12D. (b) Electropherograms (polyacrylamide urea gel) of NAVIGATER (80 °C, 20 min) products of AS WT KRAS DNA and AS KRAS G12D DNA strands as functions of MP. (c) Cleavage efficiencies of AS WT KRAS DNA and AS KRAS G12D DNA as a function of MP. (d) Stacked discrimination efficiency (DE) (difference between cleaving efficiency of WA and MA) of S and AS KRAS G12D, EGFR L858R, EGFR T790M, and BRAF V600E DNA as a function of MP. (e) Probability of DE >80% as a function of MP for all cases examined in (d). All experiments were carried out with short guides (15/16 nt) in Buffer 3 at 80 °C. TtAgo: guide: target =1: 0.2: 0.2. N=3. The mismatch types and DE values are summarized in **Supplementary Fig. 14**.



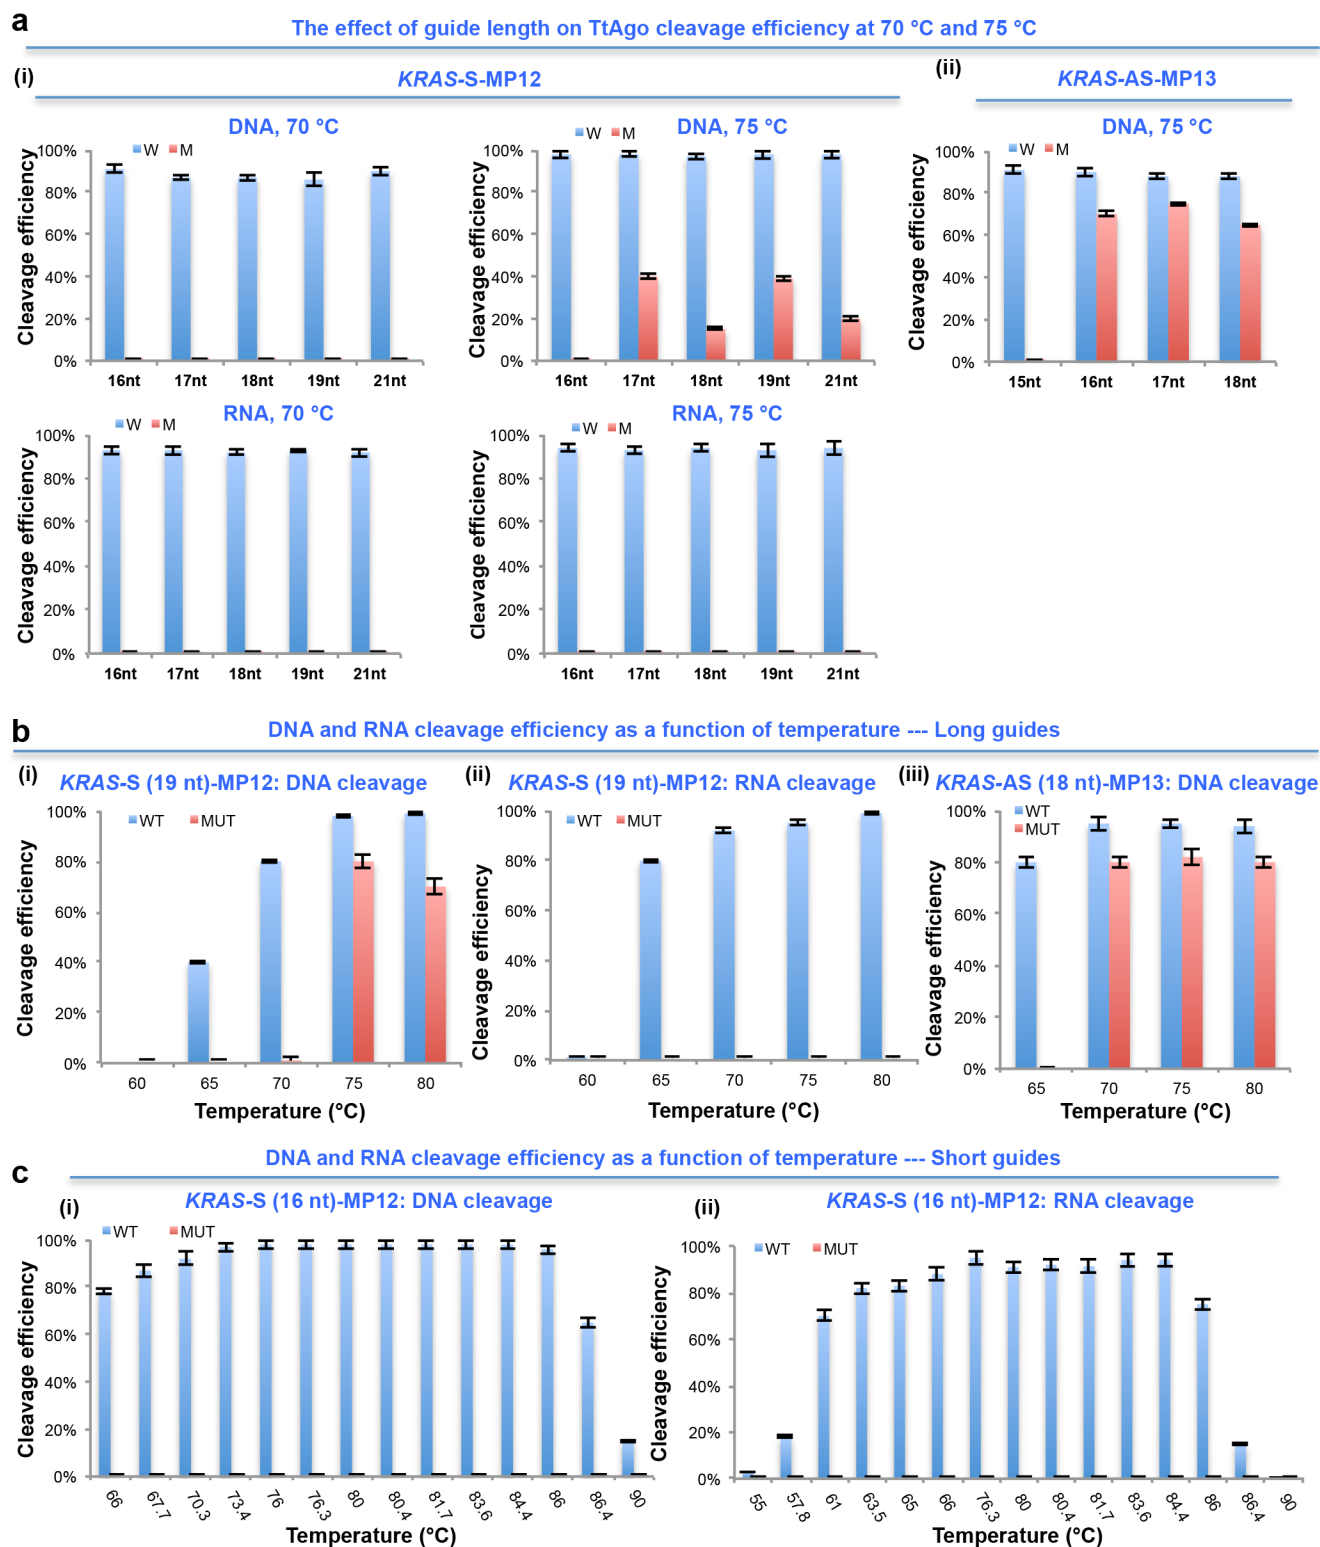

**Figure 4: Short DNA guides (15/16 nt) provide a better discrimination between WT and MA.** (a) Cleavage efficiency as a function of guide length at 70 °C and 75 °C: (i) WT *KRAS* and *KRAS* G12D, S-DNA and RNA and (ii) AS WT *KRAS* and *KRAS* G12D. (b) Cleavage efficiency as a function of temperature with 18/19 nt long guide (i) WT *KRAS* and *KRAS* G12D S-DNA, (ii) WT *KRAS* and *KRAS* G12D RNA, and (iii) WT *KRAS* and *KRAS* G12D AS-DNA. (c) Cleavage efficiency of WT *KRAS* and *KRAS* G12D (i) S-DNA and (ii) RNA as functions of temperature (16 nt long guide). Buffer 3. *TtAgo*: guide: target =1: 0.2: 0.2. N=3.



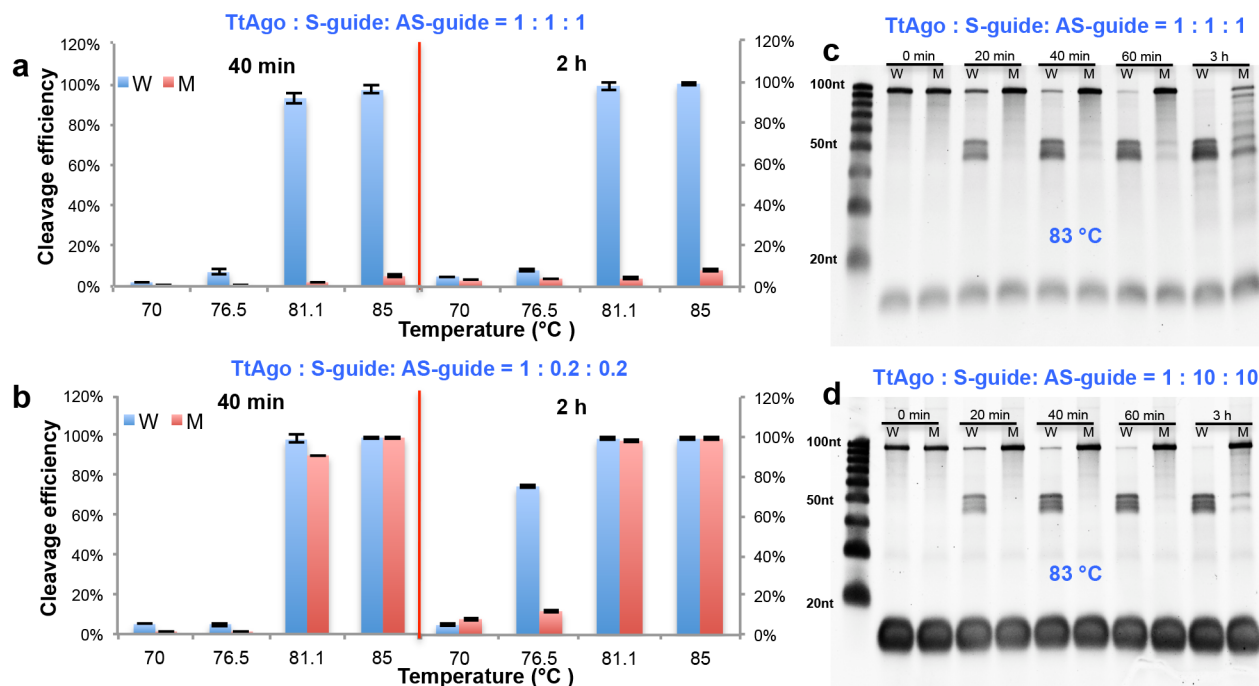

**Figure 5: Excess guide concentration provides high discrimination efficiency.** dsDNA *KRAS* and *KRAS* G12D cleavage efficiencies as functions of temperature: (a) *TtAgo*/(S-guide)/(AS-guide) concentration ratio: 1: 1 : 1, 40 min and 2h incubation time; (b) *TtAgo*/(S-guide)/(AS-guide) concentration ratio: 1: 0.2 : 0.2, 40 min and 2h incubation time. Electropherograms of NAVIGATER's products as a function of incubation (83 °C) time: (c) *TtAgo*/(S-guide)/(AS-guide) ratio 1: 1: 1 and (d) *TtAgo*/(S-guide)/(AS-guide) ratio 1: 10: 10. All experiments were carried out in buffer 3 with *KRAS*-S (16nt)-MP12 and *KRAS*-AS (15nt)-MP13 guides. N=3.

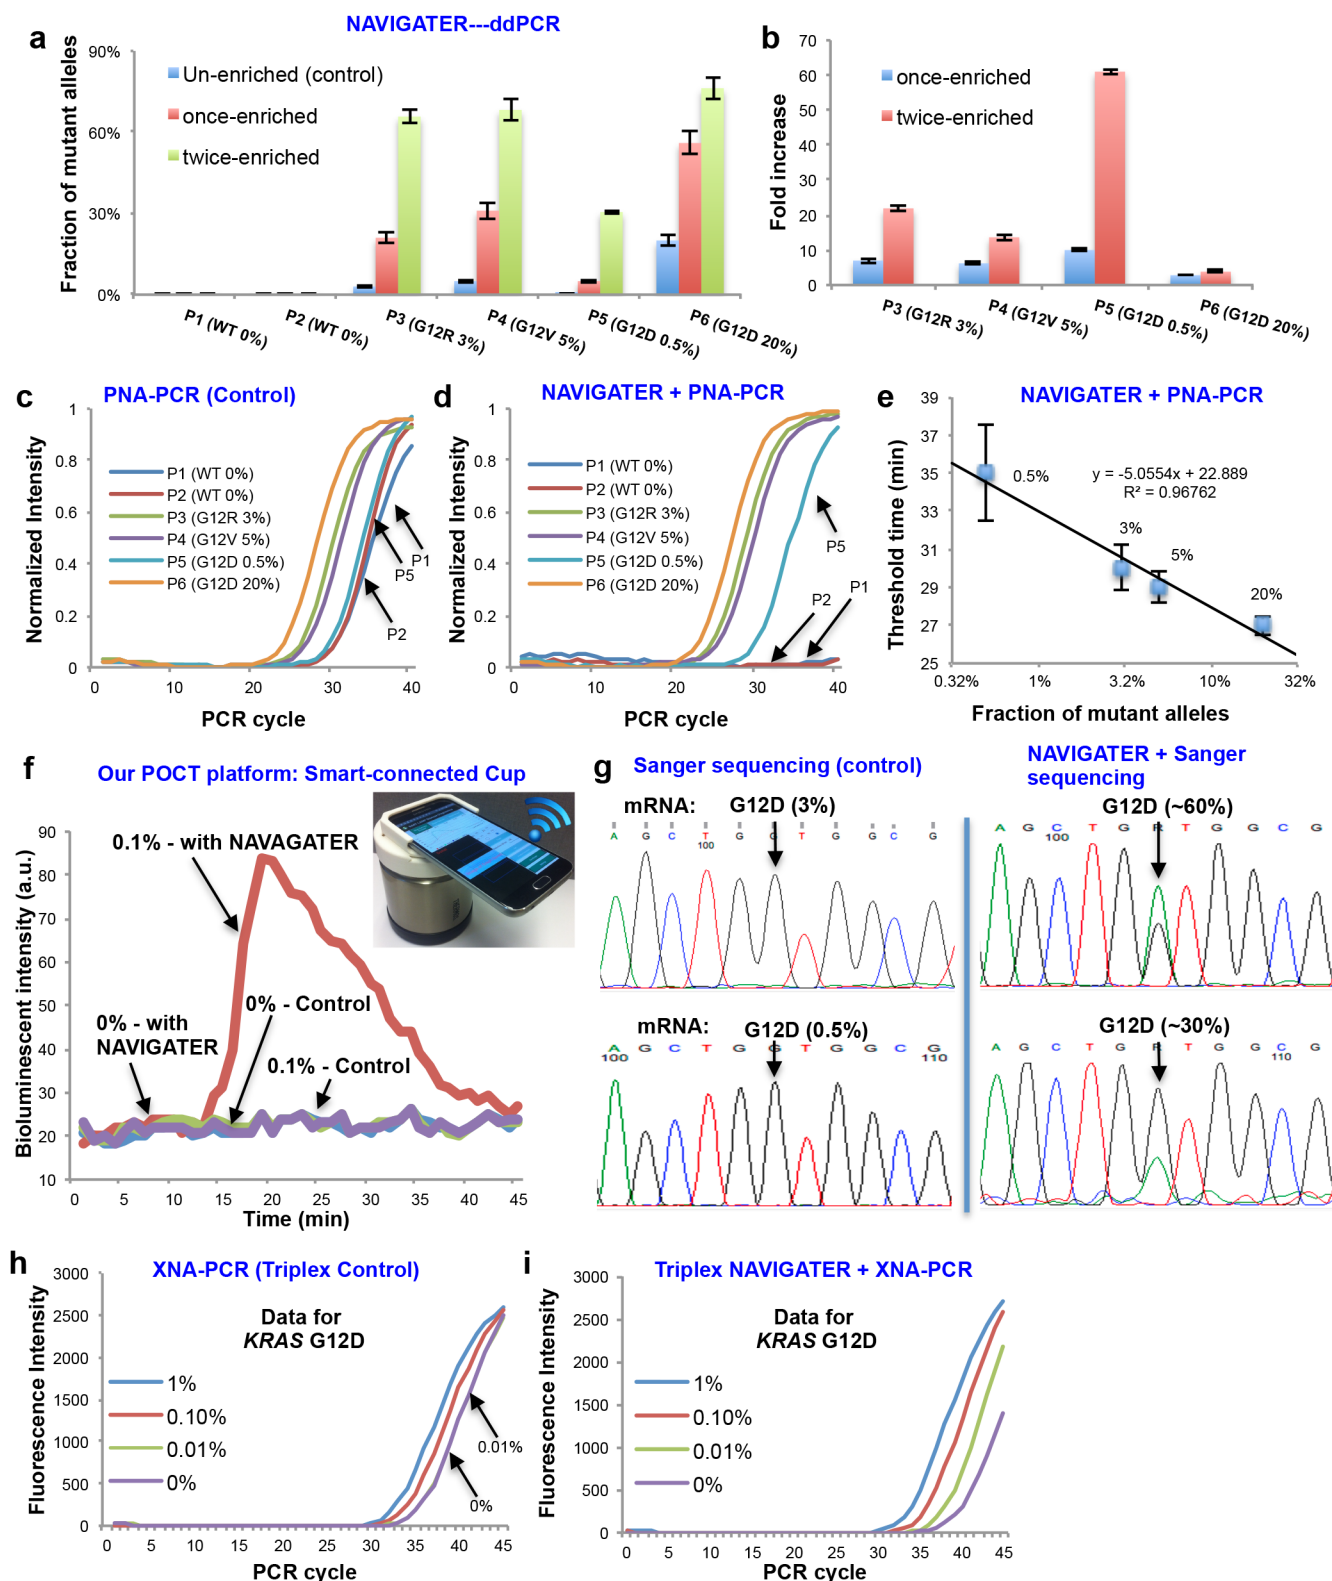

**Figure 6: NAVIGATER enhances sensitivity of downstream detection methods.** (a, b) ddPCR of samples from pancreatic cancer patients containing *KRAS* mutants (Table 2): (a) Fraction of droplets reporting mutant alleles. (b) Increase in mutant allele fraction after NAVIGATER enrichment. (c, d, e) PNA-PCR's amplification curves of pancreatic cancer patients' samples before (c) and after (d) NAVIGATER, and amplification threshold time as a function of mutant fraction (e). (f) PNA-LAMP of simulated RNA samples before and after NAVIGATER. Inset: minimally-instrumented, electricity-free Smart-Connected Cup (SCC)<sup>31</sup> for processing the assay of (f). (g) Sanger sequencing before and after

NAVIGATER when detecting simulated RNA samples. (h) and (i) XNA-PCR's amplification curves of triplex control (h, without *TtAgo* treatment) and NAVIGATER (i) products, taking *KRAS* G12D detection as a example.
